# Supplementary material for: An agent-based secure privacy-preserving decentralized protocol for sharing and managing digital health passport information during crises
Source: PeerJ Comput Sci. 2023 Jul 18;9:e1458. doi: 10.7717/peerj-cs.1458 (PMC10403165; doi:10.7717/peerj-cs.1458)
Supplement: Supplemental Information 2 — The following data iterations were generated using “Agent.Workbench” and Jade agent for CPU load during the set intersection between SMDPA and the airport agent. [file peerj-cs-09-1458-s002.xlsx]

## Sheet: SMDPA-DATASET-graph
Date	DELTA_CPU_SYSTEM_TIME	DELTA_CPU_SYSTEM_TIME		DELTA_CPU_USER_TIME		TOTAL_CPU_USER_TIME		TOTAL_CPU_SYSTEM_TIME
1.67765e+24	0	0,0	0	0,0	0	0,0	0	0,0
1.67765e+24	0	0,0	0	0,0	0	0,0	0	0,0
1.67765e+24	0	0,0	0	0,0	0	0,0	0	0,0
1.67765e+23	0	0,0	0	0,0	0	0,0	0	0,0
1.67765e+24	0	0,0	0	0,0	0	0,0	0	0,0
1.67765e+24	0	0,0	0	0,0	0	0,0	0	0,0
1.67765e+24	0	0,0	0	0,0	0	0,0	0	0,0
1.67765e+24	0	0,0	0	0,0	0	0,0	0	0,0
1.67765e+24	0	0,0	0	0,0	0	0,0	0	0,0
1.67765e+24	0	0,0	0	0,0	0	0,0	0	0,0
1.67765e+24	0	0,0	0	0,0	0	0,0	0	0,0
1.67765e+24	0	0,0	0	0,0	0	0,0	0	0,0
1.67765e+24	0	0,0	0	0,0	0	0,0	0	0,0
1.67765e+24	0	0,0	0	0,0	0	0,0	0	0,0
1.67765e+24	0	0,0	0	0,0	0	0,0	0	0,0
1.67765e+24	0	0,0	0	0,0	0	0,0	0	0,0
1.67765e+24	150	15,0	150	15,0	150	15,0	150	15,0
1.67765e+24	310	31,0	310	31,0	460	46,0	460	46,0
1.67765e+23	0	0,0	0	0,0	460	46,0	460	46,0
1.67765e+24	160	16,0	160	16,0	620	62,0	620	62,0
1.67765e+24	310	31,0	310	31,0	930	93,0	930	93,0
1.67765e+24	160	16,0	0	0,0	930	93,0	1090	109,0
1.67765e+24	160	16,0	0	0,0	930	93,0	1250	125,0
1.67765e+24	150	15,0	0	0,0	930	93,0	1400	140,0
1.67765e+24	160	16,0	160	16,0	1090	109,0	1560	156,0
1.67765e+23	150	15,0	160	16,0	1250	125,0	1710	171,0
1.67765e+24	0	0,0	0	0,0	1250	125,0	1710	171,0
1.67765e+24	160	16,0	150	15,0	1400	140,0	1870	187,0
1.67765e+24	310	31,0	310	31,0	1710	171,0	2180	218,0
1.67765e+24	0	0,0	0	0,0	1710	171,0	2180	218,0
1.67765e+24	160	16,0	160	16,0	1870	187,0	2340	234,0
1.67765e+24	160	16,0	160	16,0	2030	203,0	2500	250,0
1.67765e+24	0	0,0	0	0,0	2030	203,0	2500	250,0
1.67765e+24	0	0,0	0	0,0	2030	203,0	2500	250,0
1.67765e+24	620	62,0	620	62,0	2650	265,0	3120	312,0
1.67765e+22	0	0,0	0	0,0	2650	265,0	3120	312,0
1.67765e+24	160	16,0	160	16,0	2810	281,0	3280	328,0
1.67765e+24	0	0,0	0	0,0	2810	281,0	3280	328,0
1.67765e+24	150	15,0	0	0,0	2810	281,0	3430	343,0
1.67765e+24	0	0,0	0	0,0	2810	281,0	3430	343,0
1.67765e+24	0	0,0	0	0,0	2810	281,0	3430	343,0
1.67765e+24	470	47,0	310	31,0	3120	312,0	3900	390,0
1.67765e+24	470	47,0	470	47,0	3590	359,0	4370	437,0
1.67765e+24	310	31,0	310	31,0	3900	390,0	4680	468,0
1.67765e+24	320	32,0	310	31,0	4210	421,0	5000	500,0
1.67765e+23	460	46,0	470	47,0	4680	468,0	5460	546,0
1.67765e+24	320	32,0	320	32,0	5000	500,0	5780	578,0
1.67765e+24	150	15,0	150	15,0	5150	515,0	5930	593,0
1.67765e+24	320	32,0	310	31,0	5460	546,0	6250	625,0
1.67765e+24	620	62,0	320	32,0	5780	578,0	6870	687,0
1.67765e+24	630	63,0	470	47,0	6250	625,0	7500	750,0
1.67765e+24	150	15,0	150	15,0	6400	640,0	7650	765,0
1.67765e+24	160	16,0	160	16,0	6560	656,0	7810	781,0
1.67765e+23	310	31,0	310	31,0	6870	687,0	8120	812,0
1.67765e+24	310	31,0	310	31,0	7180	718,0	8430	843,0
1.67765e+24	320	32,0	320	32,0	7500	750,0	8750	875,0
1.67765e+24	460	46,0	460	46,0	7960	796,0	9210	921,0
1.67765e+24	0	0,0	0	0,0	7960	796,0	9210	921,0
1.67765e+24	790	79,0	790	79,0	8750	875,0	10000	1000,0
1.67765e+24	150	15,0	150	15,0	8900	890,0	10150	1015,0
1.67765e+23	310	31,0	160	16,0	9060	906,0	10460	1046,0
1.67765e+24	320	32,0	310	31,0	9370	937,0	10780	1078,0
1.67765e+24	310	31,0	310	31,0	9680	968,0	11090	1109,0
1.67765e+24	160	16,0	160	16,0	9840	984,0	11250	1125,0
1.67765e+24	310	31,0	160	16,0	10000	1000,0	11560	1156,0
1.67765e+24	310	31,0	150	15,0	10150	1015,0	11870	1187,0
1.67765e+24	160	16,0	160	16,0	10310	1031,0	12030	1203,0
1.67765e+24	310	31,0	310	31,0	10620	1062,0	12340	1234,0
1.67765e+24	160	16,0	160	16,0	10780	1078,0	12500	1250,0
1.67765e+23	310	31,0	310	31,0	11090	1109,0	12810	1281,0
1.67765e+24	150	15,0	0	0,0	11090	1109,0	12960	1296,0
1.67765e+24	320	32,0	310	31,0	11400	1140,0	13280	1328,0
1.67765e+24	310	31,0	310	31,0	11710	1171,0	13590	1359,0
1.67765e+24	310	31,0	320	32,0	12030	1203,0	13900	1390,0
1.67765e+24	310	31,0	310	31,0	12340	1234,0	14210	1421,0
1.67765e+24	320	32,0	310	31,0	12650	1265,0	14530	1453,0
1.67765e+24	150	15,0	160	16,0	12810	1281,0	14680	1468,0
1.67765e+24	320	32,0	310	31,0	13120	1312,0	15000	1500,0
1.67765e+24	0	0,0	0	0,0	13120	1312,0	15000	1500,0
1.67765e+24	310	31,0	160	16,0	13280	1328,0	15310	1531,0
1.67765e+24	310	31,0	150	15,0	13430	1343,0	15620	1562,0
1.67765e+24	310	31,0	320	32,0	13750	1375,0	15930	1593,0
1.67765e+24	160	16,0	150	15,0	13900	1390,0	16090	1609,0
1.67765e+24	160	16,0	160	16,0	14060	1406,0	16250	1625,0
1.67765e+24	150	15,0	150	15,0	14210	1421,0	16400	1640,0
1.67765e+24	470	47,0	470	47,0	14680	1468,0	16870	1687,0
1.67765e+23	310	31,0	320	32,0	15000	1500,0	17180	1718,0
1.67765e+24	160	16,0	150	15,0	15150	1515,0	17340	1734,0
1.67765e+24	620	62,0	630	63,0	15780	1578,0	17960	1796,0
1.67765e+24	320	32,0	310	31,0	16090	1609,0	18280	1828,0
1.67765e+24	150	15,0	160	16,0	16250	1625,0	18430	1843,0
1.67765e+24	160	16,0	150	15,0	16400	1640,0	18590	1859,0
1.67765e+24	470	47,0	470	47,0	16870	1687,0	19060	1906,0
1.67765e+24	310	31,0	310	31,0	17180	1718,0	19370	1937,0
1.67765e+23	310	31,0	320	32,0	17500	1750,0	19680	1968,0
1.67765e+24	160	16,0	150	15,0	17650	1765,0	19840	1984,0
1.67765e+24	310	31,0	310	31,0	17960	1796,0	20150	2015,0
1.67765e+24	160	16,0	0	0,0	17960	1796,0	20310	2031,0
1.67765e+24	470	47,0	320	32,0	18280	1828,0	20780	2078,0
1.67765e+24	620	62,0	470	47,0	18750	1875,0	21400	2140,0
1.67765e+24	160	16,0	150	15,0	18900	1890,0	21560	2156,0
1.67765e+24	780	78,0	630	63,0	19530	1953,0	22340	2234,0
1.67765e+24	160	16,0	150	15,0	19680	1968,0	22500	2250,0
1.67765e+24	150	15,0	160	16,0	19840	1984,0	22650	2265,0
1.67765e+23	0	0,0	0	0,0	19840	1984,0	22650	2265,0
1.67765e+24	470	47,0	310	31,0	20150	2015,0	23120	2312,0
1.67765e+24	310	31,0	310	31,0	20460	2046,0	23430	2343,0
1.67765e+24	0	0,0	0	0,0	20460	2046,0	23430	2343,0
1.67765e+24	780	78,0	790	79,0	21250	2125,0	24210	2421,0
1.67765e+24	160	16,0	150	15,0	21400	2140,0	24370	2437,0
1.67765e+24	310	31,0	310	31,0	21710	2171,0	24680	2468,0
1.67765e+24	630	63,0	320	32,0	22030	2203,0	25310	2531,0
1.67765e+23	150	15,0	150	15,0	22180	2218,0	25460	2546,0
1.67765e+24	320	32,0	320	32,0	22500	2250,0	25780	2578,0
1.67765e+24	150	15,0	150	15,0	22650	2265,0	25930	2593,0
1.67765e+24	0	0,0	0	0,0	22650	2265,0	25930	2593,0
1.67765e+24	0	0,0	0	0,0	22650	2265,0	25930	2593,0
1.67765e+24	0	0,0	0	0,0	22650	2265,0	25930	2593,0
1.67765e+24	320	32,0	310	31,0	22960	2296,0	26250	2625,0
1.67765e+24	150	15,0	160	16,0	23120	2312,0	26400	2640,0
1.67765e+24	310	31,0	310	31,0	23430	2343,0	26710	2671,0
1.67765e+24	160	16,0	160	16,0	23590	2359,0	26870	2687,0
1.67765e+24	160	16,0	160	16,0	23750	2375,0	27030	2703,0
1.67765e+24	310	31,0	310	31,0	24060	2406,0	27340	2734,0
1.67765e+24	160	16,0	0	0,0	24060	2406,0	27500	2750,0
1.67765e+24	150	15,0	150	15,0	24210	2421,0	27650	2765,0
1.67765e+24	160	16,0	0	0,0	24210	2421,0	27810	2781,0
1.67765e+24	310	31,0	320	32,0	24530	2453,0	28120	2812,0
1.67765e+23	630	63,0	620	62,0	25150	2515,0	28750	2875,0
1.67765e+24	310	31,0	310	31,0	25460	2546,0	29060	2906,0
1.67765e+24	150	15,0	0	0,0	25460	2546,0	29210	2921,0
1.67765e+24	470	47,0	320	32,0	25780	2578,0	29680	2968,0
1.67765e+24	320	32,0	310	31,0	26090	2609,0	30000	3000,0
1.67765e+24	0	0,0	0	0,0	26090	2609,0	30000	3000,0
1.67765e+24	0	0,0	0	0,0	26090	2609,0	30000	3000,0
1.67765e+23	780	78,0	780	78,0	26870	2687,0	30780	3078,0
1.67765e+24	470	47,0	470	47,0	27340	2734,0	31250	3125,0
1.67765e+24	310	31,0	310	31,0	27650	2765,0	31560	3156,0
1.67765e+24	470	47,0	470	47,0	28120	2812,0	32030	3203,0
1.67765e+24	470	47,0	470	47,0	28590	2859,0	32500	3250,0
1.67765e+24	150	15,0	160	16,0	28750	2875,0	32650	3265,0
1.67765e+24	780	78,0	780	78,0	29530	2953,0	33430	3343,0
1.67765e+24	320	32,0	150	15,0	29680	2968,0	33750	3375,0
1.67765e+24	310	31,0	320	32,0	30000	3000,0	34060	3406,0
1.67765e+23	470	47,0	460	46,0	30460	3046,0	34530	3453,0
1.67765e+24	470	47,0	320	32,0	30780	3078,0	35000	3500,0
1.67765e+24	150	15,0	150	15,0	30930	3093,0	35150	3515,0
1.67765e+24	470	47,0	470	47,0	31400	3140,0	35620	3562,0
1.67765e+24	630	63,0	630	63,0	32030	3203,0	36250	3625,0
1.67765e+24	310	31,0	310	31,0	32340	3234,0	36560	3656,0
1.67765e+24	470	47,0	470	47,0	32810	3281,0	37030	3703,0
1.67765e+24	470	47,0	470	47,0	33280	3328,0	37500	3750,0
1.67765e+24	460	46,0	470	47,0	33750	3375,0	37960	3796,0
1.67765e+23	470	47,0	460	46,0	34210	3421,0	38430	3843,0
1.67765e+24	470	47,0	470	47,0	34680	3468,0	38900	3890,0
1.67765e+24	780	78,0	780	78,0	35460	3546,0	39680	3968,0
1.67765e+24	160	16,0	160	16,0	35620	3562,0	39840	3984,0
1.67765e+24	160	16,0	160	16,0	35780	3578,0	40000	4000,0
1.67765e+24	620	62,0	620	62,0	36400	3640,0	40620	4062,0
1.67765e+24	0	0,0	0	0,0	36400	3640,0	40620	4062,0
1.67765e+24	310	31,0	160	16,0	36560	3656,0	40930	4093,0
1.67765e+23	470	47,0	470	47,0	37030	3703,0	41400	4140,0
1.67765e+24	630	63,0	620	62,0	37650	3765,0	42030	4203,0
1.67765e+24	310	31,0	160	16,0	37810	3781,0	42340	4234,0
1.67765e+24	940	94,0	940	94,0	38750	3875,0	43280	4328,0
1.67765e+24	310	31,0	310	31,0	39060	3906,0	43590	4359,0
1.67765e+24	620	62,0	470	47,0	39530	3953,0	44210	4421,0
1.67765e+24	160	16,0	150	15,0	39680	3968,0	44370	4437,0
1.67765e+23	630	63,0	630	63,0	40310	4031,0	45000	4500,0
1.67765e+24	620	62,0	470	47,0	40780	4078,0	45620	4562,0
1.67765e+24	630	63,0	470	47,0	41250	4125,0	46250	4625,0
1.67765e+24	150	15,0	150	15,0	41400	4140,0	46400	4640,0
1.67765e+24	0	0,0	0	0,0	41400	4140,0	46400	4640,0
1.67765e+24	310	31,0	310	31,0	41710	4171,0	46710	4671,0
1.67765e+24	160	16,0	160	16,0	41870	4187,0	46870	4687,0
1.67765e+24	160	16,0	160	16,0	42030	4203,0	47030	4703,0
1.67765e+24	150	15,0	150	15,0	42180	4218,0	47180	4718,0
1.67765e+24	160	16,0	160	16,0	42340	4234,0	47340	4734,0
1.67765e+24	310	31,0	310	31,0	42650	4265,0	47650	4765,0
1.67765e+24	0	0,0	0	0,0	42650	4265,0	47650	4765,0
1.67765e+24	160	16,0	160	16,0	42810	4281,0	47810	4781,0
1.67765e+24	780	78,0	780	78,0	43590	4359,0	48590	4859,0
1.67765e+24	310	31,0	310	31,0	43900	4390,0	48900	4890,0
1.67765e+24	310	31,0	310	31,0	44210	4421,0	49210	4921,0
1.67765e+24	160	16,0	160	16,0	44370	4437,0	49370	4937,0
1.67765e+24	310	31,0	310	31,0	44680	4468,0	49680	4968,0
1.67765e+23	160	16,0	160	16,0	44840	4484,0	49840	4984,0
1.67765e+24	310	31,0	160	16,0	45000	4500,0	50150	5015,0
1.67765e+24	160	16,0	150	15,0	45150	4515,0	50310	5031,0
1.67765e+24	310	31,0	310	31,0	45460	4546,0	50620	5062,0
1.67765e+24	160	16,0	160	16,0	45620	4562,0	50780	5078,0
1.67765e+24	620	62,0	630	63,0	46250	4625,0	51400	5140,0
1.67765e+24	470	47,0	310	31,0	46560	4656,0	51870	5187,0
1.67765e+24	310	31,0	310	31,0	46870	4687,0	52180	5218,0
1.67765e+24	320	32,0	310	31,0	47180	4718,0	52500	5250,0
1.67765e+24	620	62,0	630	63,0	47810	4781,0	53120	5312,0
1.67765e+23	160	16,0	150	15,0	47960	4796,0	53280	5328,0
1.67765e+24	780	78,0	630	63,0	48590	4859,0	54060	5406,0
1.67765e+24	0	0,0	0	0,0	48590	4859,0	54060	5406,0
1.67765e+24	470	47,0	470	47,0	49060	4906,0	54530	5453,0
1.67765e+24	930	93,0	780	78,0	49840	4984,0	55460	5546,0
1.67765e+24	940	94,0	780	78,0	50620	5062,0	56400	5640,0
1.67765e+24	160	16,0	160	16,0	50780	5078,0	56560	5656,0
1.67765e+24	470	47,0	470	47,0	51250	5125,0	57030	5703,0
1.67765e+24	310	31,0	310	31,0	51560	5156,0	57340	5734,0
1.67765e+24	310	31,0	310	31,0	51870	5187,0	57650	5765,0
1.67765e+24	160	16,0	160	16,0	52030	5203,0	57810	5781,0
1.67765e+24	310	31,0	150	15,0	52180	5218,0	58120	5812,0
1.67765e+24	630	63,0	470	47,0	52650	5265,0	58750	5875,0
1.67765e+24	620	62,0	470	47,0	53120	5312,0	59370	5937,0
1.67765e+24	470	47,0	470	47,0	53590	5359,0	59840	5984,0
1.67765e+24	470	47,0	470	47,0	54060	5406,0	60310	6031,0
1.67765e+24	470	47,0	470	47,0	54530	5453,0	60780	6078,0
1.67765e+23	470	47,0	470	47,0	55000	5500,0	61250	6125,0
1.67765e+24	460	46,0	460	46,0	55460	5546,0	61710	6171,0
1.67765e+24	470	47,0	470	47,0	55930	5593,0	62180	6218,0
1.67765e+24	630	63,0	630	63,0	56560	5656,0	62810	6281,0
1.67765e+24	0	0,0	0	0,0	56560	5656,0	62810	6281,0
1.67765e+24	0	0,0	0	0,0	56560	5656,0	62810	6281,0
1.67765e+24	470	47,0	470	47,0	57030	5703,0	63280	6328,0
1.67765e+23	470	47,0	310	31,0	57340	5734,0	63750	6375,0
1.67765e+24	150	15,0	160	16,0	57500	5750,0	63900	6390,0
1.67765e+24	470	47,0	310	31,0	57810	5781,0	64370	6437,0
1.67765e+24	160	16,0	150	15,0	57960	5796,0	64530	6453,0
1.67765e+24	310	31,0	320	32,0	58280	5828,0	64840	6484,0
1.67765e+24	0	0,0	0	0,0	58280	5828,0	64840	6484,0
1.67765e+24	0	0,0	0	0,0	58280	5828,0	64840	6484,0
1.67765e+24	160	16,0	0	0,0	58280	5828,0	65000	6500,0
1.67765e+24	460	46,0	470	47,0	58750	5875,0	65460	6546,0
1.67765e+24	470	47,0	310	31,0	59060	5906,0	65930	6593,0
1.67765e+23	320	32,0	150	15,0	59210	5921,0	66250	6625,0
1.67765e+24	150	15,0	160	16,0	59370	5937,0	66400	6640,0
1.67765e+24	1100	110,0	780	78,0	60150	6015,0	67500	6750,0
1.67765e+24	620	62,0	310	31,0	60460	6046,0	68120	6812,0
1.67765e+24	1090	109,0	940	94,0	61400	6140,0	69210	6921,0
1.67765e+24	1250	125,0	940	94,0	62340	6234,0	70460	7046,0
1.67765e+24	1100	110,0	1090	109,0	63430	6343,0	71560	7156,0
1.67765e+24	1090	109,0	1100	110,0	64530	6453,0	72650	7265,0
1.67765e+24	470	47,0	470	47,0	65000	6500,0	73120	7312,0
1.67765e+23	630	63,0	620	62,0	65620	6562,0	73750	7375,0
1.67765e+24	780	78,0	470	47,0	66090	6609,0	74530	7453,0
1.67765e+24	620	62,0	620	62,0	66710	6671,0	75150	7515,0
1.67765e+24	1250	125,0	790	79,0	67500	6750,0	76400	7640,0
1.67765e+24	630	63,0	620	62,0	68120	6812,0	77030	7703,0
1.67765e+23	1090	109,0	940	94,0	69060	6906,0	78120	7812,0
1.67765e+24	780	78,0	780	78,0	69840	6984,0	78900	7890,0
1.67765e+24	780	78,0	780	78,0	70620	7062,0	79680	7968,0
1.67765e+24	1250	125,0	1250	125,0	71870	7187,0	80930	8093,0
1.67765e+24	1100	110,0	1090	109,0	72960	7296,0	82030	8203,0
1.67765e+23	1560	156,0	1570	157,0	74530	7453,0	83590	8359,0
1.67765e+24	1560	156,0	1250	125,0	75780	7578,0	85150	8515,0
1.67765e+24	1100	110,0	1090	109,0	76870	7687,0	86250	8625,0
1.67765e+24	930	93,0	940	94,0	77810	7781,0	87180	8718,0
1.67765e+24	1570	157,0	1400	140,0	79210	7921,0	88750	8875,0
1.67765e+24	1090	109,0	940	94,0	80150	8015,0	89840	8984,0
1.67765e+24	1250	125,0	1100	110,0	81250	8125,0	91090	9109,0
1.67765e+24	1870	187,0	1710	171,0	82960	8296,0	92960	9296,0
1.67765e+24	2190	219,0	2190	219,0	85150	8515,0	95150	9515,0
1.67765e+24	1720	172,0	1560	156,0	86710	8671,0	96870	9687,0
1.67765e+23	1090	109,0	940	94,0	87650	8765,0	97960	9796,0
1.67765e+24	2190	219,0	1880	188,0	89530	8953,0	100150	10015,0
1.67765e+24	2190	219,0	2180	218,0	91710	9171,0	102340	10234,0
1.67765e+24	1870	187,0	1720	172,0	93430	9343,0	104210	10421,0
1.67765e+24	2820	282,0	2500	250,0	95930	9593,0	107030	10703,0
1.67765e+24	1870	187,0	1880	188,0	97810	9781,0	108900	10890,0
1.67765e+24	2030	203,0	2030	203,0	99840	9984,0	110930	11093,0
1.67765e+24	2500	250,0	1870	187,0	101710	10171,0	113430	11343,0
1.67765e+24	2190	219,0	2190	219,0	103900	10390,0	115620	11562,0
1.67765e+23	2190	219,0	2190	219,0	106090	10609,0	117810	11781,0
1.67765e+24	2500	250,0	2500	250,0	108590	10859,0	120310	12031,0
1.67765e+24	2030	203,0	1870	187,0	110460	11046,0	122340	12234,0
1.67765e+24	2340	234,0	2190	219,0	112650	11265,0	124680	12468,0
1.67765e+24	1720	172,0	1720	172,0	114370	11437,0	126400	12640,0
1.67765e+24	2660	266,0	2500	250,0	116870	11687,0	129060	12906,0
1.67765e+24	2030	203,0	2030	203,0	118900	11890,0	131090	13109,0
1.67765e+24	2810	281,0	2500	250,0	121400	12140,0	133900	13390,0
1.67765e+24	2500	250,0	2190	219,0	123590	12359,0	136400	13640,0
1.67765e+24	3280	328,0	2970	297,0	126560	12656,0	139680	13968,0
1.67765e+24	2970	297,0	2810	281,0	129370	12937,0	142650	14265,0
1.67765e+24	2350	235,0	2190	219,0	131560	13156,0	145000	14500,0
1.67765e+24	3900	390,0	3750	375,0	135310	13531,0	148900	14890,0
1.67765e+24	4220	422,0	3900	390,0	139210	13921,0	153120	15312,0
1.67765e+24	2340	234,0	2350	235,0	141560	14156,0	155460	15546,0
1.67765e+24	2820	282,0	2650	265,0	144210	14421,0	158280	15828,0
1.67765e+23	2810	281,0	2660	266,0	146870	14687,0	161090	16109,0
1.67765e+24	3280	328,0	2660	266,0	149530	14953,0	164370	16437,0
1.67765e+24	2190	219,0	2180	218,0	151710	15171,0	166560	16656,0
1.67765e+24	2340	234,0	2350	235,0	154060	15406,0	168900	16890,0
1.67765e+24	2190	219,0	2030	203,0	156090	15609,0	171090	17109,0
1.67765e+24	2190	219,0	2030	203,0	158120	15812,0	173280	17328,0
1.67765e+24	3430	343,0	3280	328,0	161400	16140,0	176710	17671,0
1.67765e+24	2970	297,0	2660	266,0	164060	16406,0	179680	17968,0
1.67765e+24	1100	110,0	940	94,0	165000	16500,0	180780	18078,0
1.67765e+22	0	0,0	0	0,0	165000	16500,0	180780	18078,0

## Sheet: SMDPA DATASET
	The following data iterations were generated using “Agent. Workbench” and Jade agent for CPU load during the set intersection between SMDPA and the Airport Agent.
Date	DELTA_CPU_SYSTEM_TIME	DELTA_CPU_USER_TIME	TOTAL_CPU_USER_TIME	TOTAL_CPU_SYSTEM_TIME
1.67765e+24	150	150	150	150
1.67765e+24	310	310	460	460
1.67765e+23	0	0	460	460
1.67765e+24	160	160	620	620
1.67765e+24	310	310	930	930
1.67765e+24	160	0	930	1090
1.67765e+24	160	0	930	1250
1.67765e+24	150	0	930	1400
1.67765e+24	160	160	1090	1560
1.67765e+23	150	160	1250	1710
1.67765e+24	0	0	1250	1710
1.67765e+24	160	150	1400	1870
1.67765e+24	310	310	1710	2180
1.67765e+24	0	0	1710	2180
1.67765e+24	160	160	1870	2340
1.67765e+24	160	160	2030	2500
1.67765e+24	0	0	2030	2500
1.67765e+24	0	0	2030	2500
1.67765e+24	620	620	2650	3120
1.67765e+22	0	0	2650	3120
1.67765e+24	160	160	2810	3280
1.67765e+24	0	0	2810	3280
1.67765e+24	150	0	2810	3430
1.67765e+24	0	0	2810	3430
1.67765e+24	0	0	2810	3430
1.67765e+24	470	310	3120	3900
1.67765e+24	470	470	3590	4370
1.67765e+24	310	310	3900	4680
1.67765e+24	320	310	4210	5000
1.67765e+23	460	470	4680	5460
1.67765e+24	320	320	5000	5780
1.67765e+24	150	150	5150	5930
1.67765e+24	320	310	5460	6250
1.67765e+24	620	320	5780	6870
1.67765e+24	630	470	6250	7500
1.67765e+24	150	150	6400	7650
1.67765e+24	160	160	6560	7810
1.67765e+23	310	310	6870	8120
1.67765e+24	310	310	7180	8430
1.67765e+24	320	320	7500	8750
1.67765e+24	460	460	7960	9210
1.67765e+24	0	0	7960	9210
1.67765e+24	790	790	8750	10000
1.67765e+24	150	150	8900	10150
1.67765e+23	310	160	9060	10460
1.67765e+24	320	310	9370	10780
1.67765e+24	310	310	9680	11090
1.67765e+24	160	160	9840	11250
1.67765e+24	310	160	10000	11560
1.67765e+24	310	150	10150	11870
1.67765e+24	160	160	10310	12030
1.67765e+24	310	310	10620	12340
1.67765e+24	160	160	10780	12500
1.67765e+23	310	310	11090	12810
1.67765e+24	150	0	11090	12960
1.67765e+24	320	310	11400	13280
1.67765e+24	310	310	11710	13590
1.67765e+24	310	320	12030	13900
1.67765e+24	310	310	12340	14210
1.67765e+24	320	310	12650	14530
1.67765e+24	150	160	12810	14680
1.67765e+24	320	310	13120	15000
1.67765e+24	0	0	13120	15000
1.67765e+24	310	160	13280	15310
1.67765e+24	310	150	13430	15620
1.67765e+24	310	320	13750	15930
1.67765e+24	160	150	13900	16090
1.67765e+24	160	160	14060	16250
1.67765e+24	150	150	14210	16400
1.67765e+24	470	470	14680	16870
1.67765e+23	310	320	15000	17180
1.67765e+24	160	150	15150	17340
1.67765e+24	620	630	15780	17960
1.67765e+24	320	310	16090	18280
1.67765e+24	150	160	16250	18430
1.67765e+24	160	150	16400	18590
1.67765e+24	470	470	16870	19060
1.67765e+24	310	310	17180	19370
1.67765e+23	310	320	17500	19680
1.67765e+24	160	150	17650	19840
1.67765e+24	310	310	17960	20150
1.67765e+24	160	0	17960	20310
1.67765e+24	470	320	18280	20780
1.67765e+24	620	470	18750	21400
1.67765e+24	160	150	18900	21560
1.67765e+24	780	630	19530	22340
1.67765e+24	160	150	19680	22500
1.67765e+24	150	160	19840	22650
1.67765e+23	0	0	19840	22650
1.67765e+24	470	310	20150	23120
1.67765e+24	310	310	20460	23430
1.67765e+24	0	0	20460	23430
1.67765e+24	780	790	21250	24210
1.67765e+24	160	150	21400	24370
1.67765e+24	310	310	21710	24680
1.67765e+24	630	320	22030	25310
1.67765e+23	150	150	22180	25460
1.67765e+24	320	320	22500	25780
1.67765e+24	150	150	22650	25930
1.67765e+24	0	0	22650	25930
1.67765e+24	0	0	22650	25930
1.67765e+24	0	0	22650	25930
1.67765e+24	320	310	22960	26250
1.67765e+24	150	160	23120	26400
1.67765e+24	310	310	23430	26710
1.67765e+24	160	160	23590	26870
1.67765e+24	160	160	23750	27030
1.67765e+24	310	310	24060	27340
1.67765e+24	160	0	24060	27500
1.67765e+24	150	150	24210	27650
1.67765e+24	160	0	24210	27810
1.67765e+24	310	320	24530	28120
1.67765e+23	630	620	25150	28750
1.67765e+24	310	310	25460	29060
1.67765e+24	150	0	25460	29210
1.67765e+24	470	320	25780	29680
1.67765e+24	320	310	26090	30000
1.67765e+24	0	0	26090	30000
1.67765e+24	0	0	26090	30000
1.67765e+23	780	780	26870	30780
1.67765e+24	470	470	27340	31250
1.67765e+24	310	310	27650	31560
1.67765e+24	470	470	28120	32030
1.67765e+24	470	470	28590	32500
1.67765e+24	150	160	28750	32650
1.67765e+24	780	780	29530	33430
1.67765e+24	320	150	29680	33750
1.67765e+24	310	320	30000	34060
1.67765e+23	470	460	30460	34530
1.67765e+24	470	320	30780	35000
1.67765e+24	150	150	30930	35150
1.67765e+24	470	470	31400	35620
1.67765e+24	630	630	32030	36250
1.67765e+24	310	310	32340	36560
1.67765e+24	470	470	32810	37030
1.67765e+24	470	470	33280	37500
1.67765e+24	460	470	33750	37960
1.67765e+23	470	460	34210	38430
1.67765e+24	470	470	34680	38900
1.67765e+24	780	780	35460	39680
1.67765e+24	160	160	35620	39840
1.67765e+24	160	160	35780	40000
1.67765e+24	620	620	36400	40620
1.67765e+24	0	0	36400	40620
1.67765e+24	310	160	36560	40930
1.67765e+23	470	470	37030	41400
1.67765e+24	630	620	37650	42030
1.67765e+24	310	160	37810	42340
1.67765e+24	940	940	38750	43280
1.67765e+24	310	310	39060	43590
1.67765e+24	620	470	39530	44210
1.67765e+24	160	150	39680	44370
1.67765e+23	630	630	40310	45000
1.67765e+24	620	470	40780	45620
1.67765e+24	630	470	41250	46250
1.67765e+24	150	150	41400	46400
1.67765e+24	0	0	41400	46400
1.67765e+24	310	310	41710	46710
1.67765e+24	160	160	41870	46870
1.67765e+24	160	160	42030	47030
1.67765e+24	150	150	42180	47180
1.67765e+24	160	160	42340	47340
1.67765e+24	310	310	42650	47650
1.67765e+24	0	0	42650	47650
1.67765e+24	160	160	42810	47810
1.67765e+24	780	780	43590	48590
1.67765e+24	310	310	43900	48900
1.67765e+24	310	310	44210	49210
1.67765e+24	160	160	44370	49370
1.67765e+24	310	310	44680	49680
1.67765e+23	160	160	44840	49840
1.67765e+24	310	160	45000	50150
1.67765e+24	160	150	45150	50310
1.67765e+24	310	310	45460	50620
1.67765e+24	160	160	45620	50780
1.67765e+24	620	630	46250	51400
1.67765e+24	470	310	46560	51870
1.67765e+24	310	310	46870	52180
1.67765e+24	320	310	47180	52500
1.67765e+24	620	630	47810	53120
1.67765e+23	160	150	47960	53280
1.67765e+24	780	630	48590	54060
1.67765e+24	0	0	48590	54060
1.67765e+24	470	470	49060	54530
1.67765e+24	930	780	49840	55460
1.67765e+24	940	780	50620	56400
1.67765e+24	160	160	50780	56560
1.67765e+24	470	470	51250	57030
1.67765e+24	310	310	51560	57340
1.67765e+24	310	310	51870	57650
1.67765e+24	160	160	52030	57810
1.67765e+24	310	150	52180	58120
1.67765e+24	630	470	52650	58750
1.67765e+24	620	470	53120	59370
1.67765e+24	470	470	53590	59840
1.67765e+24	470	470	54060	60310
1.67765e+24	470	470	54530	60780
1.67765e+23	470	470	55000	61250
1.67765e+24	460	460	55460	61710
1.67765e+24	470	470	55930	62180
1.67765e+24	630	630	56560	62810
1.67765e+24	0	0	56560	62810
1.67765e+24	0	0	56560	62810
1.67765e+24	470	470	57030	63280
1.67765e+23	470	310	57340	63750
1.67765e+24	150	160	57500	63900
1.67765e+24	470	310	57810	64370
1.67765e+24	160	150	57960	64530
1.67765e+24	310	320	58280	64840
1.67765e+24	0	0	58280	64840
1.67765e+24	0	0	58280	64840
1.67765e+24	160	0	58280	65000
1.67765e+24	460	470	58750	65460
1.67765e+24	470	310	59060	65930
1.67765e+23	320	150	59210	66250
1.67765e+24	150	160	59370	66400
1.67765e+24	1100	780	60150	67500
1.67765e+24	620	310	60460	68120
1.67765e+24	1090	940	61400	69210
1.67765e+24	1250	940	62340	70460
1.67765e+24	1100	1090	63430	71560
1.67765e+24	1090	1100	64530	72650
1.67765e+24	470	470	65000	73120
1.67765e+23	630	620	65620	73750
1.67765e+24	780	470	66090	74530
1.67765e+24	620	620	66710	75150
1.67765e+24	1250	790	67500	76400
1.67765e+24	630	620	68120	77030
1.67765e+23	1090	940	69060	78120
1.67765e+24	780	780	69840	78900
1.67765e+24	780	780	70620	79680
1.67765e+24	1250	1250	71870	80930
1.67765e+24	1100	1090	72960	82030
1.67765e+23	1560	1570	74530	83590
1.67765e+24	1560	1250	75780	85150
1.67765e+24	1100	1090	76870	86250
1.67765e+24	930	940	77810	87180
1.67765e+24	1570	1400	79210	88750
1.67765e+24	1090	940	80150	89840
1.67765e+24	1250	1100	81250	91090
1.67765e+24	1870	1710	82960	92960
1.67765e+24	2190	2190	85150	95150
1.67765e+24	1720	1560	86710	96870
1.67765e+23	1090	940	87650	97960
1.67765e+24	2190	1880	89530	100150
1.67765e+24	2190	2180	91710	102340
1.67765e+24	1870	1720	93430	104210
1.67765e+24	2820	2500	95930	107030
1.67765e+24	1870	1880	97810	108900
1.67765e+24	2030	2030	99840	110930
1.67765e+24	2500	1870	101710	113430
1.67765e+24	2190	2190	103900	115620
1.67765e+23	2190	2190	106090	117810
1.67765e+24	2500	2500	108590	120310
1.67765e+24	2030	1870	110460	122340
1.67765e+24	2340	2190	112650	124680
1.67765e+24	1720	1720	114370	126400
1.67765e+24	2660	2500	116870	129060
1.67765e+24	2030	2030	118900	131090
1.67765e+24	2810	2500	121400	133900
1.67765e+24	2500	2190	123590	136400
1.67765e+24	3280	2970	126560	139680
1.67765e+24	2970	2810	129370	142650
1.67765e+24	2350	2190	131560	145000
1.67765e+24	3900	3750	135310	148900
1.67765e+24	4220	3900	139210	153120
1.67765e+24	2340	2350	141560	155460
1.67765e+24	2820	2650	144210	158280
1.67765e+23	2810	2660	146870	161090
1.67765e+24	3280	2660	149530	164370
1.67765e+24	2190	2180	151710	166560
1.67765e+24	2340	2350	154060	168900
1.67765e+24	2190	2030	156090	171090
1.67765e+24	2190	2030	158120	173280
1.67765e+24	3430	3280	161400	176710
1.67765e+24	2970	2660	164060	179680
1.67765e+24	1100	940	165000	180780
1.67765e+22	0	0	165000	180780

## Sheet: SMDPA Data
The following data iterations were generated using “Agent. Workbench” and Jade agent for CPU load during the set intersection between SMDPA and the Airport Agent.
Date	DELTA_CPU_SYSTEM_TIME	DELTA_CPU_USER_TIME	TOTAL_CPU_USER_TIME	TOTAL_CPU_SYSTEM_TIME
1.67765e+24	150	150	150	150
1.67765e+24	310	310	460	460
1.67765e+23	0	0	460	460
1.67765e+24	160	160	620	620
1.67765e+24	310	310	930	930
1.67765e+24	160	0	930	1090
1.67765e+24	160	0	930	1250
1.67765e+24	150	0	930	1400
1.67765e+24	160	160	1090	1560
1.67765e+23	150	160	1250	1710
1.67765e+24	0	0	1250	1710
1.67765e+24	160	150	1400	1870
1.67765e+24	310	310	1710	2180
1.67765e+24	0	0	1710	2180
1.67765e+24	160	160	1870	2340
1.67765e+24	160	160	2030	2500
1.67765e+24	0	0	2030	2500
1.67765e+24	0	0	2030	2500
1.67765e+24	620	620	2650	3120
1.67765e+22	0	0	2650	3120
1.67765e+24	160	160	2810	3280
1.67765e+24	0	0	2810	3280
1.67765e+24	150	0	2810	3430
1.67765e+24	0	0	2810	3430
1.67765e+24	0	0	2810	3430
1.67765e+24	470	310	3120	3900
1.67765e+24	470	470	3590	4370
1.67765e+24	310	310	3900	4680
1.67765e+24	320	310	4210	5000
1.67765e+23	460	470	4680	5460
1.67765e+24	320	320	5000	5780
1.67765e+24	150	150	5150	5930
1.67765e+24	320	310	5460	6250
1.67765e+24	620	320	5780	6870
1.67765e+24	630	470	6250	7500
1.67765e+24	150	150	6400	7650
1.67765e+24	160	160	6560	7810
1.67765e+23	310	310	6870	8120
1.67765e+24	310	310	7180	8430
1.67765e+24	320	320	7500	8750
1.67765e+24	460	460	7960	9210
1.67765e+24	0	0	7960	9210
1.67765e+24	790	790	8750	10000
1.67765e+24	150	150	8900	10150
1.67765e+23	310	160	9060	10460
1.67765e+24	320	310	9370	10780
1.67765e+24	310	310	9680	11090
1.67765e+24	160	160	9840	11250
1.67765e+24	310	160	10000	11560
1.67765e+24	310	150	10150	11870
1.67765e+24	160	160	10310	12030
1.67765e+24	310	310	10620	12340
1.67765e+24	160	160	10780	12500
1.67765e+23	310	310	11090	12810
1.67765e+24	150	0	11090	12960
1.67765e+24	320	310	11400	13280
1.67765e+24	310	310	11710	13590
1.67765e+24	310	320	12030	13900
1.67765e+24	310	310	12340	14210
1.67765e+24	320	310	12650	14530
1.67765e+24	150	160	12810	14680
1.67765e+24	320	310	13120	15000
1.67765e+24	0	0	13120	15000
1.67765e+24	310	160	13280	15310
1.67765e+24	310	150	13430	15620
1.67765e+24	310	320	13750	15930
1.67765e+24	160	150	13900	16090
1.67765e+24	160	160	14060	16250
1.67765e+24	150	150	14210	16400
1.67765e+24	470	470	14680	16870
1.67765e+23	310	320	15000	17180
1.67765e+24	160	150	15150	17340
1.67765e+24	620	630	15780	17960
1.67765e+24	320	310	16090	18280
1.67765e+24	150	160	16250	18430
1.67765e+24	160	150	16400	18590
1.67765e+24	470	470	16870	19060
1.67765e+24	310	310	17180	19370
1.67765e+23	310	320	17500	19680
1.67765e+24	160	150	17650	19840
1.67765e+24	310	310	17960	20150
1.67765e+24	160	0	17960	20310
1.67765e+24	470	320	18280	20780
1.67765e+24	620	470	18750	21400
1.67765e+24	160	150	18900	21560
1.67765e+24	780	630	19530	22340
1.67765e+24	160	150	19680	22500
1.67765e+24	150	160	19840	22650
1.67765e+23	0	0	19840	22650
1.67765e+24	470	310	20150	23120
1.67765e+24	310	310	20460	23430
1.67765e+24	0	0	20460	23430
1.67765e+24	780	790	21250	24210
1.67765e+24	160	150	21400	24370
1.67765e+24	310	310	21710	24680
1.67765e+24	630	320	22030	25310
1.67765e+23	150	150	22180	25460
1.67765e+24	320	320	22500	25780
1.67765e+24	150	150	22650	25930
1.67765e+24	0	0	22650	25930
1.67765e+24	0	0	22650	25930
1.67765e+24	0	0	22650	25930
1.67765e+24	320	310	22960	26250
1.67765e+24	150	160	23120	26400
1.67765e+24	310	310	23430	26710
1.67765e+24	160	160	23590	26870
1.67765e+24	160	160	23750	27030
1.67765e+24	310	310	24060	27340
1.67765e+24	160	0	24060	27500
1.67765e+24	150	150	24210	27650
1.67765e+24	160	0	24210	27810
1.67765e+24	310	320	24530	28120
1.67765e+23	630	620	25150	28750
1.67765e+24	310	310	25460	29060
1.67765e+24	150	0	25460	29210
1.67765e+24	470	320	25780	29680
1.67765e+24	320	310	26090	30000
1.67765e+24	0	0	26090	30000
1.67765e+24	0	0	26090	30000
1.67765e+23	780	780	26870	30780
1.67765e+24	470	470	27340	31250
1.67765e+24	310	310	27650	31560
1.67765e+24	470	470	28120	32030
1.67765e+24	470	470	28590	32500
1.67765e+24	150	160	28750	32650
1.67765e+24	780	780	29530	33430
1.67765e+24	320	150	29680	33750
1.67765e+24	310	320	30000	34060
1.67765e+23	470	460	30460	34530
1.67765e+24	470	320	30780	35000
1.67765e+24	150	150	30930	35150
1.67765e+24	470	470	31400	35620
1.67765e+24	630	630	32030	36250
1.67765e+24	310	310	32340	36560
1.67765e+24	470	470	32810	37030
1.67765e+24	470	470	33280	37500
1.67765e+24	460	470	33750	37960
1.67765e+23	470	460	34210	38430
1.67765e+24	470	470	34680	38900
1.67765e+24	780	780	35460	39680
1.67765e+24	160	160	35620	39840
1.67765e+24	160	160	35780	40000
1.67765e+24	620	620	36400	40620
1.67765e+24	0	0	36400	40620
1.67765e+24	310	160	36560	40930
1.67765e+23	470	470	37030	41400
1.67765e+24	630	620	37650	42030
1.67765e+24	310	160	37810	42340
1.67765e+24	940	940	38750	43280
1.67765e+24	310	310	39060	43590
1.67765e+24	620	470	39530	44210
1.67765e+24	160	150	39680	44370
1.67765e+23	630	630	40310	45000
1.67765e+24	620	470	40780	45620
1.67765e+24	630	470	41250	46250
1.67765e+24	150	150	41400	46400
1.67765e+24	0	0	41400	46400
1.67765e+24	310	310	41710	46710
1.67765e+24	160	160	41870	46870
1.67765e+24	160	160	42030	47030
1.67765e+24	150	150	42180	47180
1.67765e+24	160	160	42340	47340
1.67765e+24	310	310	42650	47650
1.67765e+24	0	0	42650	47650
1.67765e+24	160	160	42810	47810
1.67765e+24	780	780	43590	48590
1.67765e+24	310	310	43900	48900
1.67765e+24	310	310	44210	49210
1.67765e+24	160	160	44370	49370
1.67765e+24	310	310	44680	49680
1.67765e+23	160	160	44840	49840
1.67765e+24	310	160	45000	50150
1.67765e+24	160	150	45150	50310
1.67765e+24	310	310	45460	50620
1.67765e+24	160	160	45620	50780
1.67765e+24	620	630	46250	51400
1.67765e+24	470	310	46560	51870
1.67765e+24	310	310	46870	52180
1.67765e+24	320	310	47180	52500
1.67765e+24	620	630	47810	53120
1.67765e+23	160	150	47960	53280
1.67765e+24	780	630	48590	54060
1.67765e+24	0	0	48590	54060
1.67765e+24	470	470	49060	54530
1.67765e+24	930	780	49840	55460
1.67765e+24	940	780	50620	56400
1.67765e+24	160	160	50780	56560
1.67765e+24	470	470	51250	57030
1.67765e+24	310	310	51560	57340
1.67765e+24	310	310	51870	57650
1.67765e+24	160	160	52030	57810
1.67765e+24	310	150	52180	58120
1.67765e+24	630	470	52650	58750
1.67765e+24	620	470	53120	59370
1.67765e+24	470	470	53590	59840
1.67765e+24	470	470	54060	60310
1.67765e+24	470	470	54530	60780
1.67765e+23	470	470	55000	61250
1.67765e+24	460	460	55460	61710
1.67765e+24	470	470	55930	62180
1.67765e+24	630	630	56560	62810
1.67765e+24	0	0	56560	62810
1.67765e+24	0	0	56560	62810
1.67765e+24	470	470	57030	63280
1.67765e+23	470	310	57340	63750
1.67765e+24	150	160	57500	63900
1.67765e+24	470	310	57810	64370
1.67765e+24	160	150	57960	64530
1.67765e+24	310	320	58280	64840
1.67765e+24	0	0	58280	64840
1.67765e+24	0	0	58280	64840
1.67765e+24	160	0	58280	65000
1.67765e+24	460	470	58750	65460
1.67765e+24	470	310	59060	65930
1.67765e+23	320	150	59210	66250
1.67765e+24	150	160	59370	66400
1.67765e+24	1100	780	60150	67500
1.67765e+24	620	310	60460	68120
1.67765e+24	1090	940	61400	69210
1.67765e+24	1250	940	62340	70460
1.67765e+24	1100	1090	63430	71560
1.67765e+24	1090	1100	64530	72650
1.67765e+24	470	470	65000	73120
1.67765e+23	630	620	65620	73750
1.67765e+24	780	470	66090	74530
1.67765e+24	620	620	66710	75150
1.67765e+24	1250	790	67500	76400
1.67765e+24	630	620	68120	77030
1.67765e+23	1090	940	69060	78120
1.67765e+24	780	780	69840	78900
1.67765e+24	780	780	70620	79680
1.67765e+24	1250	1250	71870	80930
1.67765e+24	1100	1090	72960	82030
1.67765e+23	1560	1570	74530	83590
1.67765e+24	1560	1250	75780	85150
1.67765e+24	1100	1090	76870	86250
1.67765e+24	930	940	77810	87180
1.67765e+24	1570	1400	79210	88750
1.67765e+24	1090	940	80150	89840
1.67765e+24	1250	1100	81250	91090
1.67765e+24	1870	1710	82960	92960
1.67765e+24	2190	2190	85150	95150
1.67765e+24	1720	1560	86710	96870
1.67765e+23	1090	940	87650	97960
1.67765e+24	2190	1880	89530	100150
1.67765e+24	2190	2180	91710	102340
1.67765e+24	1870	1720	93430	104210
1.67765e+24	2820	2500	95930	107030
1.67765e+24	1870	1880	97810	108900
1.67765e+24	2030	2030	99840	110930
1.67765e+24	2500	1870	101710	113430
1.67765e+24	2190	2190	103900	115620
1.67765e+23	2190	2190	106090	117810
1.67765e+24	2500	2500	108590	120310
1.67765e+24	2030	1870	110460	122340
1.67765e+24	2340	2190	112650	124680
1.67765e+24	1720	1720	114370	126400
1.67765e+24	2660	2500	116870	129060
1.67765e+24	2030	2030	118900	131090
1.67765e+24	2810	2500	121400	133900
1.67765e+24	2500	2190	123590	136400
1.67765e+24	3280	2970	126560	139680
1.67765e+24	2970	2810	129370	142650
1.67765e+24	2350	2190	131560	145000
1.67765e+24	3900	3750	135310	148900
1.67765e+24	4220	3900	139210	153120
1.67765e+24	2340	2350	141560	155460
1.67765e+24	2820	2650	144210	158280
1.67765e+23	2810	2660	146870	161090
1.67765e+24	3280	2660	149530	164370
1.67765e+24	2190	2180	151710	166560
1.67765e+24	2340	2350	154060	168900
1.67765e+24	2190	2030	156090	171090
1.67765e+24	2190	2030	158120	173280
1.67765e+24	3430	3280	161400	176710
1.67765e+24	2970	2660	164060	179680
1.67765e+24	1100	940	165000	180780
1.67765e+22	0	0	165000	180780
Average CPU Load	650.288	593.525	43632	48745.6

## Sheet: SMDBA DATA
The following data iterations were generated using “Agent. Workbench” and Jade agent for CPU load during the set intersection between SMDPA and the Airport Agent.
Date	DELTA CPU SYSTEM TIME (ms)	DELTA CPU USER TIME (ms)	TOTAL CPU USER TIME (ms)	TOTAL CPU SYSTEM TIME (ms)
1.67765e+24	150	150	150	150
1.67765e+24	310	310	460	460
1.67765e+23	0	0	460	460
1.67765e+24	160	160	620	620
1.67765e+24	310	310	930	930
1.67765e+24	160	0	930	1090
1.67765e+24	160	0	930	1250
1.67765e+24	150	0	930	1400
1.67765e+24	160	160	1090	1560
1.67765e+23	150	160	1250	1710
Average CPU Load	171	125	775	963
